# Supplementary material
Source: PubMed Central journal article supplement (PMC6721950)
Supplement: supp_RA118.007331_142822_2_supp_361035_pwfwxj.pdf [file supp_RA118.007331_142822_2_supp_361035_pwfwxj.pdf]

## Supporting Information

### A herpesvirus transactivator and cellular POU proteins extensively regulate DNA binding of the host Notch signaling protein RBP-Jk to the virus genome

Olga Gonzalez-Lopez, Jennifer DeCotiis, Corey Goyeneche, Helena Mello, Bryan Alexis Vicente-Ortiz, Hyejin Shin, Kyla Driscoll, Peicheng Du, Diana Palmeri, and David M. Lukac

#### Contents:

**Figure S1.** Kinetics of Rta and DE gene expression in VPA-treated BC-3 cells.

**Figure S2.** The median heights of Rta and RBP-Jk peaks associated with each other and Rta-c motifs.

**Figure S3.** Sequence logos for DNA motifs associated preferentially with RBP-Jk Class 2 peaks.

**Figure S4.** Sequence logos for DNA motifs associated preferentially with RBP-Jk Class 2/Rta peaks.

**Figure S5.** Sequence logos for DNA motifs associated preferentially with RBP-Jk Class 5 peaks.

**Figure S6.** Sequence logos for orphan motifs.

**Figure S7.** Coincident Rta-c/Oct-v motifs are overrepresented in KSHV DE promoters.

**Figure S8.** Rta-c and Oct-v motifs are closer to Jk2 peaks than to Jk5 peaks.

**Figure S9.** Rta binds sequence-specifically to the Rta-c/Oct-v motif from the ORF50AS/K-bZIP promoter

**Table S1.** Genome wide analysis of Rta and RBP-Jk DNA binding on the KSHV genome during latency and reactivation: data.

**Table S2.** Classification of RBP-Jk peaks in latency and reactivation of KSHV: data

**Table S3.** Orphan Motifs over-represented at RBP-Jk peaks at early promoters

**Table S4.** Localization of dual Rta-c/POU Motifs at RBP-Jk and Rta peaks at early promoters

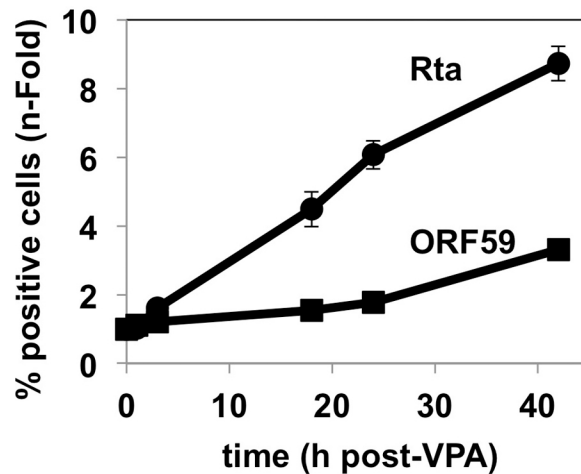

**Figure S1. Kinetics of Rta and DE gene expression in VPA-treated BC-3 cells.** Duplicate cultures of BC-3 cells were either left untreated or treated with 1mM VPA. At the indicated timepoints, cells were harvested and  $2.5 \times 10^5$  cells/200 $\mu$ l were adhered to poly-*L*-lysine (Sigma)-coated glasses slides in circles drawn with a Pap pen (Life Technologies) for 30 minutes at room temperature. Cells were fixed by incubation in pre-chilled methanol: acetone (1:1), -20°C for 10 minutes. After fixation, cells were blocked using fresh 3% BSA/1% glycine in 1xPBS at room temperature for 30 minutes. Proteins were detected by indirect immunofluorescence using primary rabbit anti-Rta and mouse anti-ORF59 (Santa Cruz Biotechnology; 1:1000 in blocking buffer) at room temperature for 1 hour, followed by two washes in 1xPBS 0.4% Tween 20 for 30 minutes, then one wash in 1xPBS for 30 minutes. Secondary antibodies were goat anti-rabbit Dylight 488 Conjugated (Invitrogen) and goat anti-Mouse Dylight 550 conjugated (Thermo Scientific; 1:500 in blocking buffer) at room temperature for 1 hour, followed by washes as described above. Cover slips were mounted inverted in Vectashield (Vector Labs). Reactivation was scored by counting >1500 cells, then dividing the number of cells expressing Rta, or ORF59, by the total number of cells in >10 fields per replicate, for each circle, to determine percent reactivation. Fold reactivation was determined by dividing percent of antigen expressing cells at each time point by percent at time 0 (untreated) and plotted above.

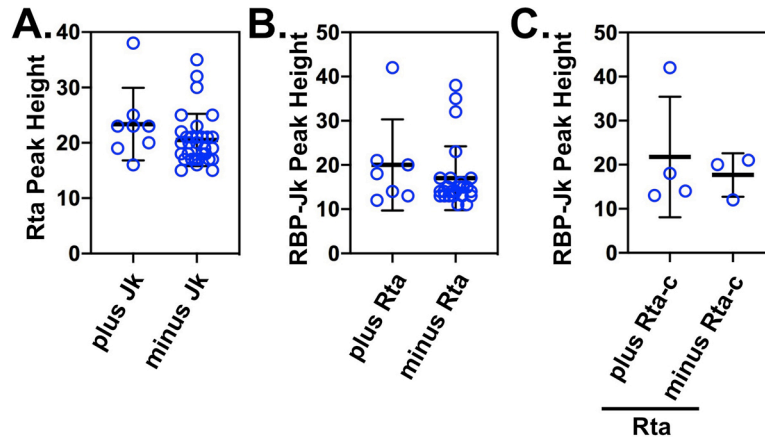

**Figure S2. The median heights of Rta and RBP-Jk peaks associated with each other and Rta-c motifs.** Peak height ranges (read depth/bp) for the indicated groups of peaks in viral DE promoters. Thick lines show Median heights, thin lines show boundaries of 2<sup>nd</sup> and third quartiles. **(A)** Rta peak heights. “Jk”=RBP-Jk **(B and C)**. RBP-Jk peak heights.

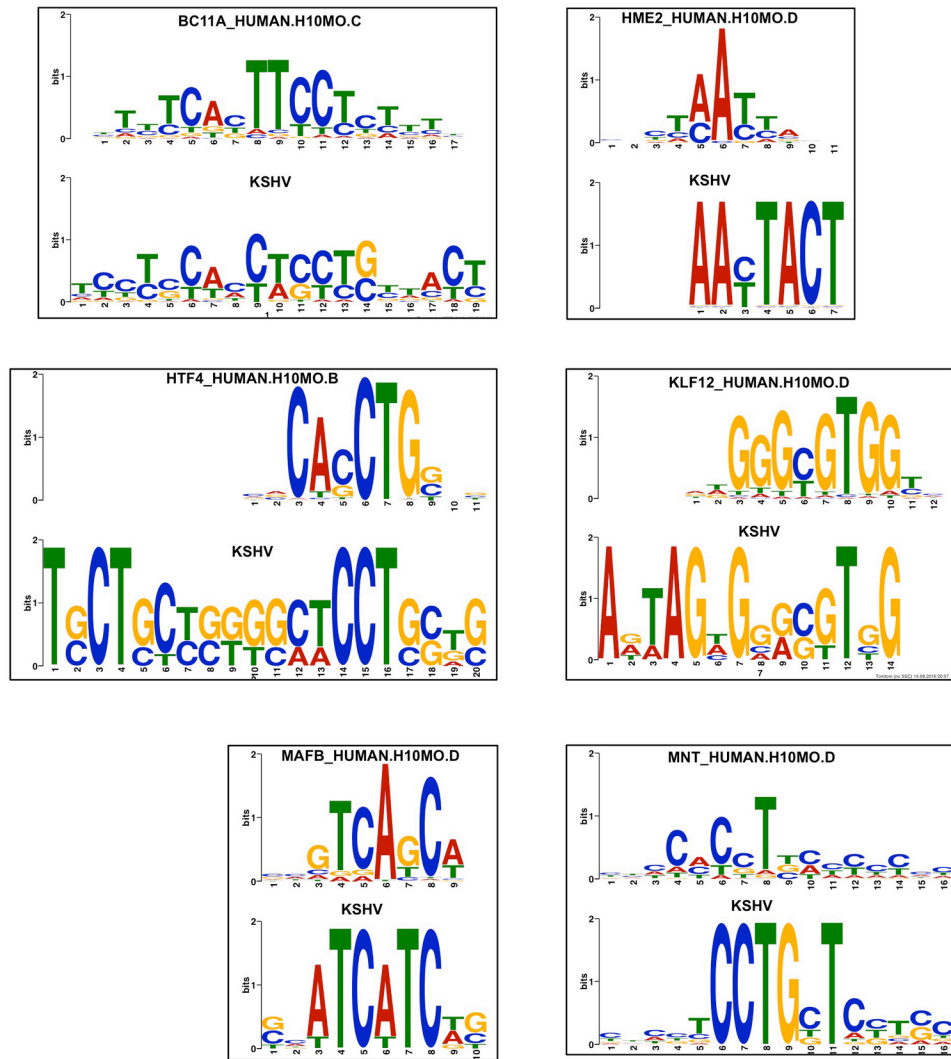

**Figure S3. Sequence logos for DNA motifs associated preferentially with RBP-Jk Class 2 peaks.** Motifs were identified using a discriminative MEME search described in Table 3 (40). The KSHV genome was searched for occurrences of matches to each consensus motif in the KSHV genome using the FIMO algorithm (117). Sequence logos were generated for the resulting set of matching motifs.

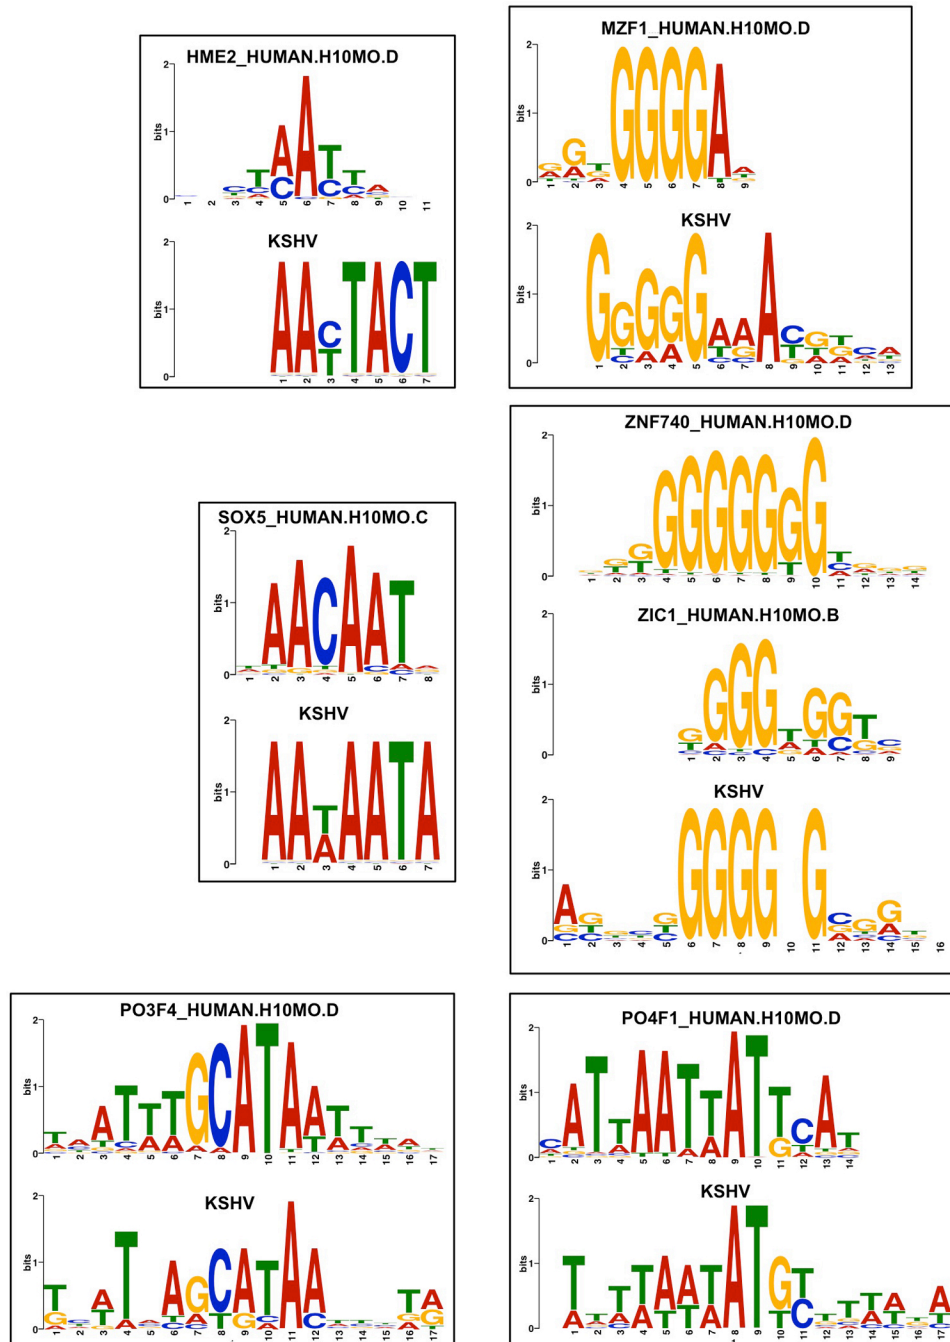

**Figure S4. Sequence logos for DNA motifs associated preferentially with RBP-Jk Class 2/Rta peaks.** Motifs were identified using a discriminative MEME search described in Table 4 (40). The KSHV genome was searched for occurrences of matches to each consensus motif in the KSHV genome using the FIMO algorithm (117). Sequence logos were generated for the resulting set of matching motifs.

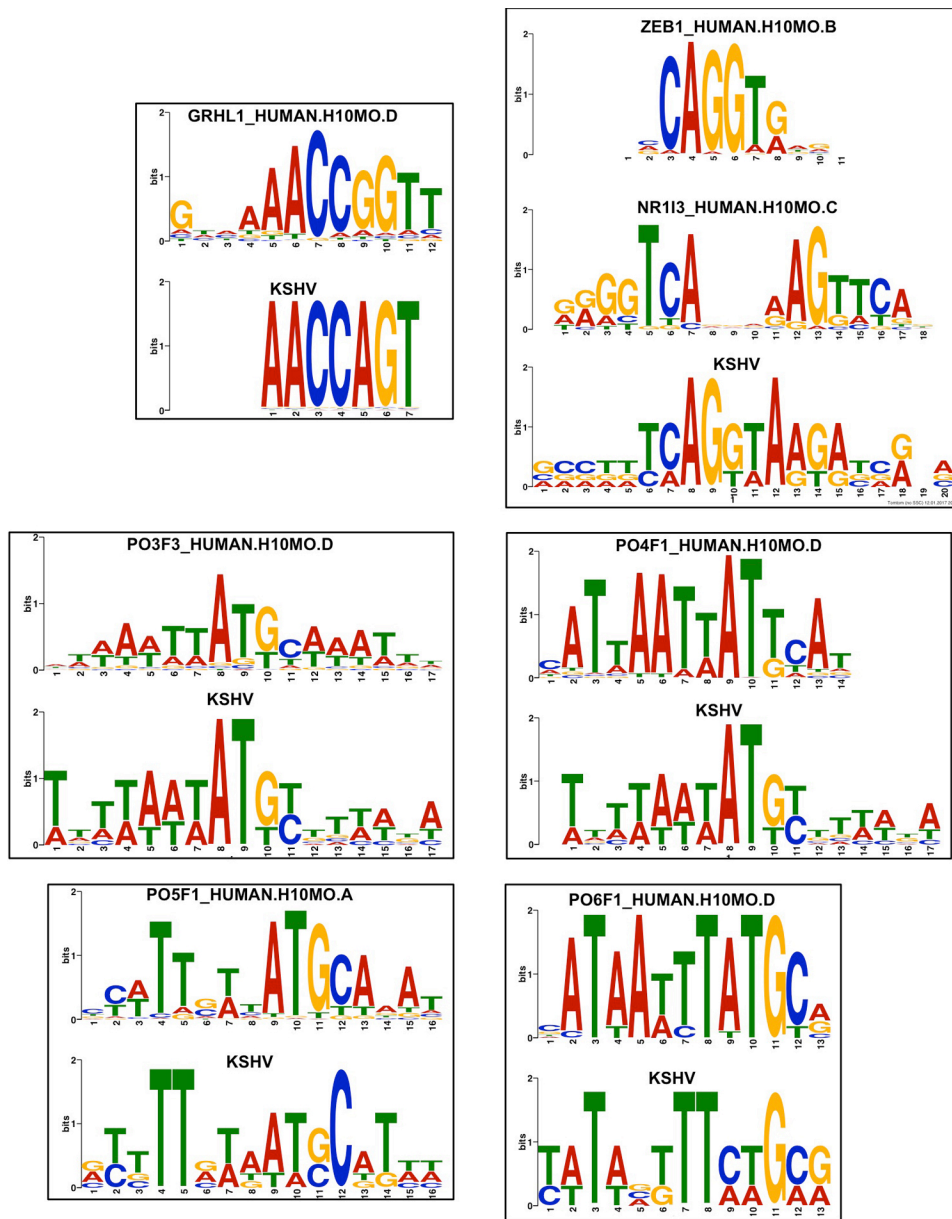

**Figure S5. Sequence logos for DNA motifs associated preferentially with RBP-Jk Class 5 peaks.** Motifs were identified using a discriminative MEME search described in Table 5 (40). The KSHV genome was searched for occurrences of matches to each consensus motif in the KSHV genome using the FIMO algorithm (117). Sequence logos were generated for the resulting set of matching motifs.

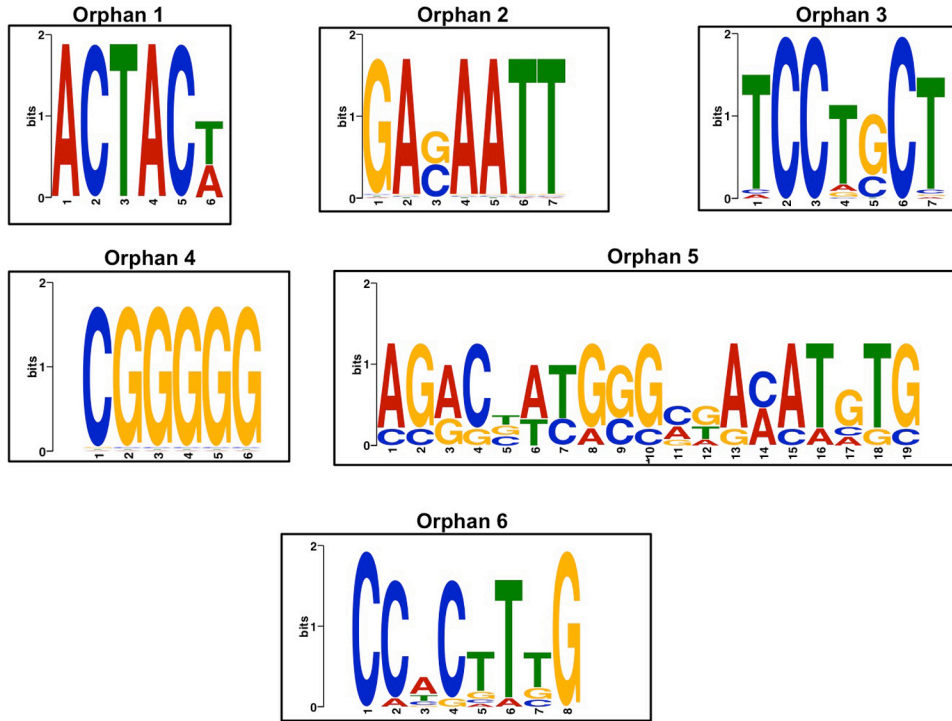

**Figure S6. Sequence logos for orphan motifs.** Motifs were identified using a discriminative MEME search described in Table S3 (40). The KSHV genome was searched for occurrences of matches to each consensus motif in the KSHV genome using the FIMO algorithm (117). Sequence logos were generated for the resulting set of matching motifs.

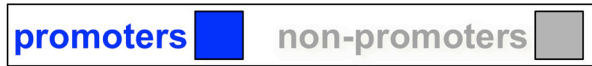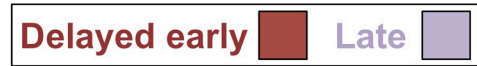

**A** Fraction of genome in promoters

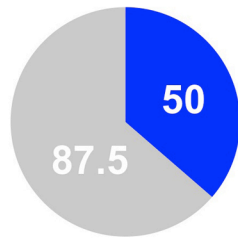

**B** Fraction of promoters DE or L

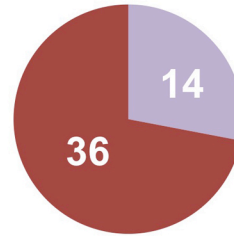

Fraction of Rta-c and Oct-v in promoters

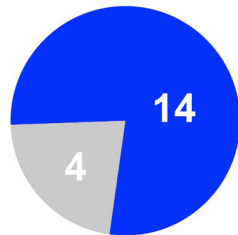

Fraction of Rta-c and Oct-v DE or L

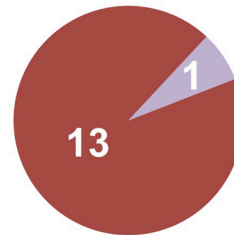

**Figure S7. Coincident Rta-c/Oct-v motifs are overrepresented in KSHV DE promoters.**

**(A) Proportion of Rta-c/Oct-v motifs in promoters.** Blue segments represent proportion of KSHV genome located in promoters. Grey segments represent proportion of genome outside of promoters. Numbers indicate kb. of sequence at top, number of Rta-c/Oct-v motifs at bottom. **(B) Proportion of Rta-c/Oct-v motifs in delayed early vs. late promoters.** Brown segments represent proportion of genome in KSHV DE promoters. Purple segments represent proportion of KSHV L promoters. Numbers indicate numbers of promoters at top, and number of Rta-c/Oct-v motifs at bottom.



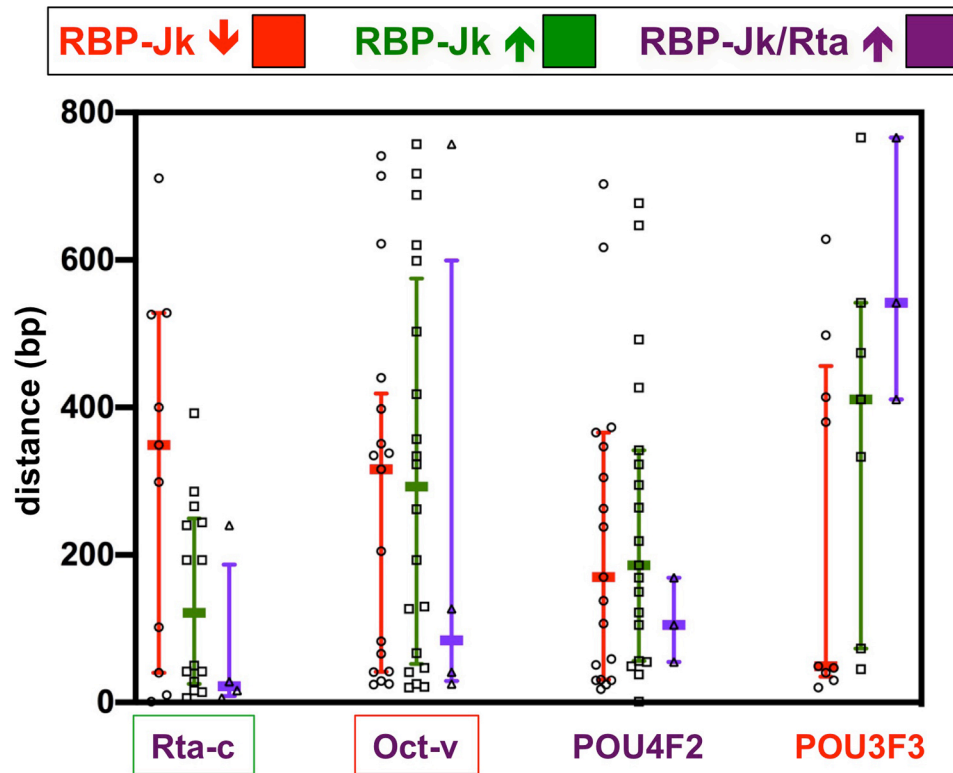

**Figure S8. Rta-c and Oct-v motifs are closer to Jk2 peaks than to Jk5 peaks.** The range of shortest distances between each RBP-Jk peak and each of the motifs indicated on the x axis was calculated in all viral DE promoter DNA. Thick lines show median heights, thin lines show boundaries of 2<sup>nd</sup> and third quartiles.

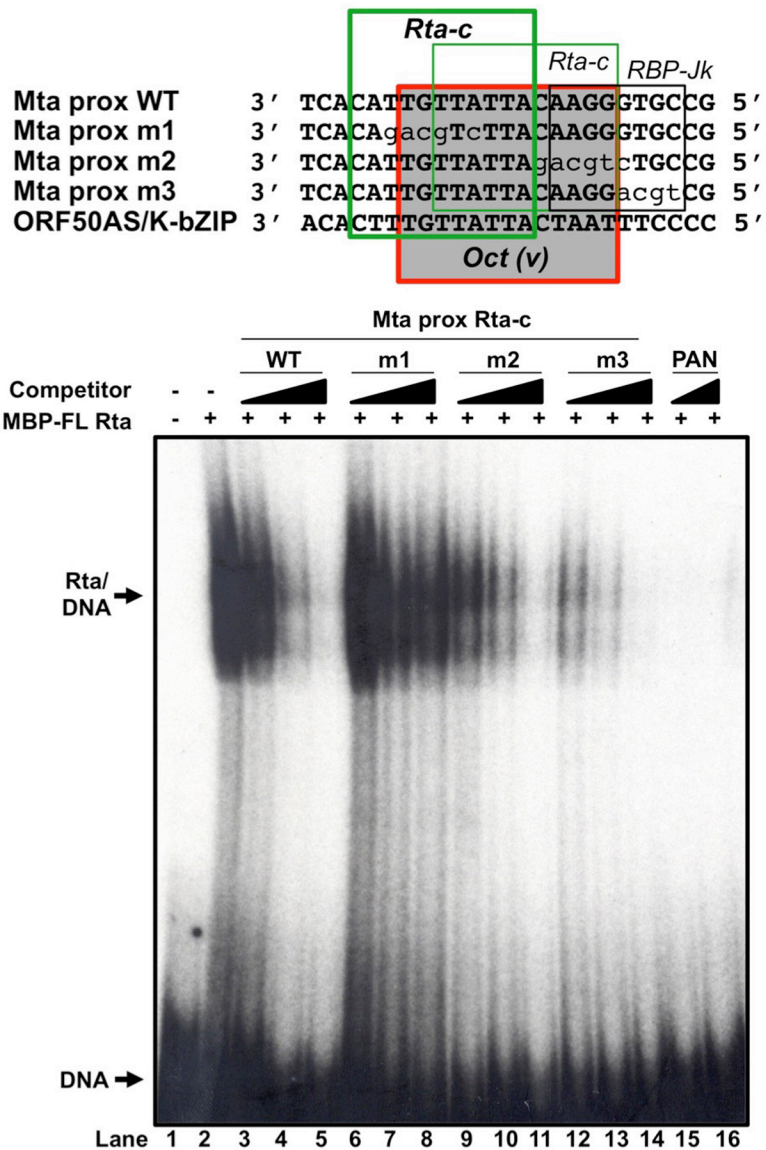

**Figure S9. Rta binds sequence-specifically to the Rta-c/Oct-v motif from the ORF50AS/K-bZIP promoter.** Increasing amounts of the indicated, un-labeled competitor DNAs were pre-incubated with MBP FL-Rta, before addition of <sup>32</sup>P-labeled ORF50AS/K-bZIP DNA. Mixtures were electrophoresed and visualized by autoradiography. Sequences of the oligos are shown at the top. The motifs conserved in the Mta and ORF50AS/K-bZIP promoters are labeled in bold; standard labels show the motifs found only in Mta.

**Table S1. Genome wide analysis of Rta and RBP-Jk DNA binding on the KSHV genome during latency and reactivation: data. (A). Rta (+VPA) (B). RBP-Jk (+VPA) (C). RBP-Jk (-VPA) (D). Rta and RBP-Jk (+VPA) co-localized peaks. Abbreviations: Chr=chromosome input for MACS2 read mapping, start=genome position of start of peak (bp), end=genome position of end of peak (bp), length=length of peak (bp), abs\_summit=peak summit, pileup=height in read depth of peak summit, Kinetics= Replication kinetics of transcription start sites corresponding to promoters (DE=delayed early, L=Late)), Rank by height=rank of individual peak heights in descending order. On Table D, green text=RBP-Jk peak increased in reactivation, red text=RBP-Jk peak decreased in reactivation.**

Table S1A. Rta (+VPA) peaks

| Peak # | chr                             | start | end   | length | abs_summit | pileup | Promoter         | Kinetics | Rank by Height |
|--------|---------------------------------|-------|-------|--------|------------|--------|------------------|----------|----------------|
| 1      | gi 2065526 gb U75698.1 KSU75698 | 786   | 1352  | 567    | 875        | 35     | ORF4             | DE       | 5              |
| 2      | gi 2065526 gb U75698.1 KSU75698 | 1427  | 1646  | 220    | 1568       | 22     |                  |          | 22             |
| 3      | gi 2065526 gb U75698.1 KSU75698 | 1705  | 2483  | 779    | 1881       | 25     |                  |          | 10             |
| 4      | gi 2065526 gb U75698.1 KSU75698 | 2530  | 2629  | 100    | 2539       | 16     | ORF6             | DE       | 93             |
| 5      | gi 2065526 gb U75698.1 KSU75698 | 2663  | 2993  | 331    | 2716       | 18     | ORF6             | DE       | 63             |
| 6      | gi 2065526 gb U75698.1 KSU75698 | 3754  | 3922  | 169    | 3849       | 16     |                  |          | 94             |
| 7      | gi 2065526 gb U75698.1 KSU75698 | 4581  | 4716  | 136    | 4602       | 17     |                  |          | 75             |
| 8      | gi 2065526 gb U75698.1 KSU75698 | 4884  | 4993  | 110    | 4910       | 18     |                  |          | 64             |
| 9      | gi 2065526 gb U75698.1 KSU75698 | 6070  | 6293  | 224    | 6158       | 16     |                  |          | 95             |
| 10     | gi 2065526 gb U75698.1 KSU75698 | 6612  | 6819  | 208    | 6759       | 17     |                  |          | 76             |
| 11     | gi 2065526 gb U75698.1 KSU75698 | 7495  | 7658  | 164    | 7519       | 17     |                  |          | 77             |
| 12     | gi 2065526 gb U75698.1 KSU75698 | 12465 | 12730 | 266    | 12548      | 17     |                  |          | 78             |
| 13     | gi 2065526 gb U75698.1 KSU75698 | 15956 | 16055 | 100    | 15986      | 19     |                  |          | 48             |
| 14     | gi 2065526 gb U75698.1 KSU75698 | 17172 | 17271 | 100    | 17185      | 16     |                  |          | 96             |
| 15     | gi 2065526 gb U75698.1 KSU75698 | 18218 | 18409 | 192    | 18302      | 17     | vIL6             | DE       | 79             |
| 16     | gi 2065526 gb U75698.1 KSU75698 | 19126 | 19264 | 139    | 19190      | 20     |                  |          | 33             |
| 17     | gi 2065526 gb U75698.1 KSU75698 | 19940 | 20079 | 140    | 19968      | 15     | K3int            | DE       | 102            |
| 18     | gi 2065526 gb U75698.1 KSU75698 | 22694 | 22832 | 139    | 22768      | 25     | K4               | DE       | 11             |
| 19     | gi 2065526 gb U75698.1 KSU75698 | 22943 | 23188 | 246    | 23096      | 32     | K4.1/4.2         | DE       | 6              |
| 20     | gi 2065526 gb U75698.1 KSU75698 | 24173 | 24605 | 433    | 24425      | 41     |                  |          | 3              |
| 21     | gi 2065526 gb U75698.1 KSU75698 | 28288 | 28421 | 134    | 28355      | 23     | K6/K6.2/PAN      | DE/DE/DE | 16             |
| 22     | gi 2065526 gb U75698.1 KSU75698 | 28472 | 28808 | 337    | 28617      | 30     | K6/PAN           | DE/DE    | 8              |
| 23     | gi 2065526 gb U75698.1 KSU75698 | 29508 | 29607 | 100    | 29574      | 16     | ORF16            | DE       | 97             |
| 24     | gi 2065526 gb U75698.1 KSU75698 | 29706 | 29811 | 106    | 29788      | 20     | ORF16            | DE       | 34             |
| 25     | gi 2065526 gb U75698.1 KSU75698 | 30071 | 30170 | 100    | 30125      | 17     |                  |          | 80             |
| 26     | gi 2065526 gb U75698.1 KSU75698 | 33105 | 33204 | 100    | 33184      | 18     | ORF17            | L        | 65             |
| 27     | gi 2065526 gb U75698.1 KSU75698 | 34605 | 34716 | 112    | 34628      | 15     | ORF21            | L        | 103            |
| 28     | gi 2065526 gb U75698.1 KSU75698 | 37032 | 37131 | 100    | 37116      | 18     |                  |          | 66             |
| 29     | gi 2065526 gb U75698.1 KSU75698 | 39207 | 39306 | 100    | 39281      | 17     |                  |          | 81             |
| 30     | gi 2065526 gb U75698.1 KSU75698 | 39540 | 39705 | 166    | 39611      | 20     |                  |          | 35             |
| 31     | gi 2065526 gb U75698.1 KSU75698 | 42083 | 42327 | 245    | 42252      | 21     | ORF25            | L        | 23             |
| 32     | gi 2065526 gb U75698.1 KSU75698 | 44138 | 44339 | 202    | 44221      | 20     |                  |          | 36             |
| 33     | gi 2065526 gb U75698.1 KSU75698 | 45271 | 45452 | 182    | 45357      | 20     |                  |          | 37             |
| 34     | gi 2065526 gb U75698.1 KSU75698 | 45880 | 46028 | 149    | 45953      | 23     | ORF26            | L        | 17             |
| 35     | gi 2065526 gb U75698.1 KSU75698 | 46867 | 47026 | 160    | 46951      | 17     | ORF27            | L        | 82             |
| 36     | gi 2065526 gb U75698.1 KSU75698 | 51506 | 51834 | 329    | 51546      | 18     |                  |          | 67             |
| 37     | gi 2065526 gb U75698.1 KSU75698 | 52641 | 52745 | 105    | 52660      | 17     | ORF33            | L        | 83             |
| 38     | gi 2065526 gb U75698.1 KSU75698 | 52806 | 53024 | 219    | 52929      | 20     |                  |          | 38             |
| 39     | gi 2065526 gb U75698.1 KSU75698 | 54848 | 54984 | 137    | 54896      | 17     | ORF35            | DE       | 84             |
| 40     | gi 2065526 gb U75698.1 KSU75698 | 55379 | 55521 | 143    | 55460      | 21     | ORF35            | DE       | 24             |
| 41     | gi 2065526 gb U75698.1 KSU75698 | 55670 | 55840 | 171    | 55786      | 20     |                  |          | 39             |
| 42     | gi 2065526 gb U75698.1 KSU75698 | 59287 | 59397 | 111    | 59368      | 18     |                  |          | 68             |
| 43     | gi 2065526 gb U75698.1 KSU75698 | 59607 | 59707 | 101    | 59698      | 19     |                  |          | 49             |
| 44     | gi 2065526 gb U75698.1 KSU75698 | 61238 | 61364 | 127    | 61281      | 17     |                  |          | 85             |
| 45     | gi 2065526 gb U75698.1 KSU75698 | 63287 | 63404 | 118    | 63341      | 19     |                  |          | 50             |
| 46     | gi 2065526 gb U75698.1 KSU75698 | 66392 | 66500 | 109    | 66457      | 19     |                  |          | 51             |
| 47     | gi 2065526 gb U75698.1 KSU75698 | 66774 | 66912 | 139    | 66899      | 16     |                  |          | 98             |
| 48     | gi 2065526 gb U75698.1 KSU75698 | 68562 | 68665 | 104    | 68602      | 15     |                  |          | 104            |
| 49     | gi 2065526 gb U75698.1 KSU75698 | 68973 | 69253 | 281    | 69005      | 19     | ORF45/50         | DE/DE    | 52             |
| 50     | gi 2065526 gb U75698.1 KSU75698 | 69560 | 69713 | 154    | 69618      | 18     | ORF45/45.1/50    | DE/DE/DE | 69             |
| 51     | gi 2065526 gb U75698.1 KSU75698 | 70022 | 70121 | 100    | 70086      | 19     | ORF45.1/46-47/50 | DE/DE/DE | 53             |
| 52     | gi 2065526 gb U75698.1 KSU75698 | 70163 | 70509 | 347    | 70284      | 25     | ORF46-47/50      | DE/DE    | 12             |
| 53     | gi 2065526 gb U75698.1 KSU75698 | 70664 | 71086 | 423    | 71004      | 23     | ORF50            | DE       | 18             |
| 54     | gi 2065526 gb U75698.1 KSU75698 | 71279 | 71484 | 206    | 71410      | 23     | ORF50            | DE       | 19             |
| 55     | gi 2065526 gb U75698.1 KSU75698 | 72523 | 73198 | 676    | 72909      | 30     |                  |          | 9              |
| 56     | gi 2065526 gb U75698.1 KSU75698 | 73276 | 74056 | 781    | 73655      | 25     |                  |          | 13             |
| 57     | gi 2065526 gb U75698.1 KSU75698 | 74177 | 74971 | 795    | 74720      | 38     | ORF50AS/KbZIP    | DE       | 4              |
| 58     | gi 2065526 gb U75698.1 KSU75698 | 75100 | 75328 | 229    | 75151      | 20     | ORF50AS/K8.1     | DE/L     | 40             |
| 59     | gi 2065526 gb U75698.1 KSU75698 | 75748 | 75858 | 111    | 75823      | 17     | K8.1             | L        | 86             |
| 60     | gi 2065526 gb U75698.1 KSU75698 | 77312 | 77455 | 144    | 77382      | 17     | ORF52            | DE       | 87             |
| 61     | gi 2065526 gb U75698.1 KSU75698 | 77889 | 78040 | 152    | 77958      | 20     | ORF52/53         | DE/DE    | 41             |
| 62     | gi 2065526 gb U75698.1 KSU75698 | 78160 | 78281 | 122    | 78244      | 21     | ORF53            | DE       | 25             |
| 63     | gi 2065526 gb U75698.1 KSU75698 | 81220 | 81361 | 142    | 81306      | 21     | ORF57            | DE       | 26             |
| 64     | gi 2065526 gb U75698.1 KSU75698 | 81820 | 81959 | 140    | 81901      | 16     | ORF57            | DE       | 99             |
| 65     | gi 2065526 gb U75698.1 KSU75698 | 83031 | 83162 | 132    | 83091      | 19     |                  |          | 54             |
| 66     | gi 2065526 gb U75698.1 KSU75698 | 86214 | 86366 | 153    | 86295      | 21     |                  |          | 27             |

|                                     |        |        |      |        |    |           |       |     |
|-------------------------------------|--------|--------|------|--------|----|-----------|-------|-----|
| 67 gi 2065526 gb U75698.1 KSU75698  | 88621  | 88787  | 167  | 88745  | 21 |           |       | 28  |
| 68 gi 2065526 gb U75698.1 KSU75698  | 89809  | 89945  | 137  | 89892  | 20 |           |       | 42  |
| 69 gi 2065526 gb U75698.1 KSU75698  | 92629  | 93000  | 372  | 92700  | 25 |           |       | 14  |
| 70 gi 2065526 gb U75698.1 KSU75698  | 94514  | 94636  | 123  | 94552  | 19 |           |       | 55  |
| 71 gi 2065526 gb U75698.1 KSU75698  | 95078  | 95229  | 152  | 95171  | 21 |           |       | 29  |
| 72 gi 2065526 gb U75698.1 KSU75698  | 96712  | 96945  | 234  | 96880  | 20 | ORF58-59  | DE    | 43  |
| 73 gi 2065526 gb U75698.1 KSU75698  | 97841  | 97993  | 153  | 97911  | 20 |           |       | 44  |
| 74 gi 2065526 gb U75698.1 KSU75698  | 98148  | 98278  | 131  | 98217  | 17 |           |       | 88  |
| 75 gi 2065526 gb U75698.1 KSU75698  | 98447  | 98711  | 265  | 98497  | 20 |           |       | 45  |
| 76 gi 2065526 gb U75698.1 KSU75698  | 99176  | 99279  | 104  | 99227  | 17 |           |       | 89  |
| 77 gi 2065526 gb U75698.1 KSU75698  | 100415 | 100518 | 104  | 100438 | 21 | ORF60-61  | DE    | 30  |
| 78 gi 2065526 gb U75698.1 KSU75698  | 102701 | 102880 | 180  | 102841 | 16 |           |       | 100 |
| 79 gi 2065526 gb U75698.1 KSU75698  | 103072 | 103205 | 134  | 103113 | 18 |           |       | 70  |
| 80 gi 2065526 gb U75698.1 KSU75698  | 104391 | 104651 | 261  | 104568 | 19 |           |       | 56  |
| 81 gi 2065526 gb U75698.1 KSU75698  | 105302 | 105427 | 126  | 105342 | 19 |           |       | 57  |
| 82 gi 2065526 gb U75698.1 KSU75698  | 105668 | 105814 | 147  | 105735 | 23 |           |       | 20  |
| 83 gi 2065526 gb U75698.1 KSU75698  | 106325 | 106445 | 121  | 106407 | 19 |           |       | 58  |
| 84 gi 2065526 gb U75698.1 KSU75698  | 106554 | 106692 | 139  | 106642 | 19 |           |       | 59  |
| 85 gi 2065526 gb U75698.1 KSU75698  | 106938 | 107190 | 253  | 107125 | 21 |           |       | 31  |
| 86 gi 2065526 gb U75698.1 KSU75698  | 110254 | 110423 | 170  | 110342 | 16 |           |       | 101 |
| 87 gi 2065526 gb U75698.1 KSU75698  | 110575 | 110774 | 200  | 110685 | 19 |           |       | 60  |
| 88 gi 2065526 gb U75698.1 KSU75698  | 112362 | 112539 | 178  | 112483 | 18 |           |       | 71  |
| 89 gi 2065526 gb U75698.1 KSU75698  | 113706 | 113822 | 117  | 113773 | 17 |           |       | 90  |
| 90 gi 2065526 gb U75698.1 KSU75698  | 118038 | 118425 | 388  | 118176 | 31 |           |       | 7   |
| 91 gi 2065526 gb U75698.1 KSU75698  | 118694 | 118921 | 228  | 118859 | 20 | K12       | L     | 46  |
| 92 gi 2065526 gb U75698.1 KSU75698  | 119099 | 119200 | 102  | 119190 | 19 | K12       | L     | 61  |
| 93 gi 2065526 gb U75698.1 KSU75698  | 120035 | 120373 | 339  | 120187 | 24 |           |       | 15  |
| 94 gi 2065526 gb U75698.1 KSU75698  | 120628 | 120729 | 102  | 120690 | 23 |           |       | 21  |
| 95 gi 2065526 gb U75698.1 KSU75698  | 121205 | 121320 | 116  | 121302 | 18 |           |       | 72  |
| 96 gi 2065526 gb U75698.1 KSU75698  | 122306 | 122479 | 174  | 122356 | 17 |           |       | 91  |
| 97 gi 2065526 gb U75698.1 KSU75698  | 122649 | 122749 | 101  | 122715 | 18 |           |       | 73  |
| 98 gi 2065526 gb U75698.1 KSU75698  | 124778 | 125107 | 330  | 124873 | 44 |           |       | 2   |
| 99 gi 2065526 gb U75698.1 KSU75698  | 125235 | 125341 | 107  | 125291 | 20 |           |       | 47  |
| 100 gi 2065526 gb U75698.1 KSU75698 | 125427 | 126467 | 1041 | 125758 | 45 |           |       | 1   |
| 101 gi 2065526 gb U75698.1 KSU75698 | 126940 | 127059 | 120  | 126993 | 21 | K14/ORF74 | DE/DE | 32  |
| 102 gi 2065526 gb U75698.1 KSU75698 | 128286 | 128403 | 118  | 128326 | 18 | ORF73     | DE    | 74  |
| 103 gi 2065526 gb U75698.1 KSU75698 | 130893 | 131005 | 113  | 130919 | 17 |           |       | 92  |
| 104 gi 2065526 gb U75698.1 KSU75698 | 133717 | 133840 | 124  | 133776 | 19 |           |       | 62  |

Table S1B. RBP-Jk (+VPA) peaks

| Peak # | chr                             | start  | end    | length | abs_summit | pileup | Promoter         | Kinetics    | Rank by Height |
|--------|---------------------------------|--------|--------|--------|------------|--------|------------------|-------------|----------------|
| 1      | gi 2065526 gb U75698.1 KSU75698 | 1583   | 1751   | 169    | 1687       | 12     |                  |             | 77             |
| 2      | gi 2065526 gb U75698.1 KSU75698 | 2263   | 2447   | 185    | 2295       | 13     | ORF6             | DE          | 56             |
| 3      | gi 2065526 gb U75698.1 KSU75698 | 2643   | 2842   | 200    | 2704       | 12     | ORF6             | DE          | 78             |
| 4      | gi 2065526 gb U75698.1 KSU75698 | 4424   | 4561   | 138    | 4508       | 14     |                  |             | 40             |
| 5      | gi 2065526 gb U75698.1 KSU75698 | 4772   | 4912   | 141    | 4837       | 14     |                  |             | 41             |
| 6      | gi 2065526 gb U75698.1 KSU75698 | 6088   | 6406   | 319    | 6139       | 16     |                  |             | 26             |
| 7      | gi 2065526 gb U75698.1 KSU75698 | 6088   | 6406   | 319    | 6346       | 13     |                  |             | 57             |
| 8      | gi 2065526 gb U75698.1 KSU75698 | 8223   | 8327   | 105    | 8294       | 15     | ORF8             | DE          | 30             |
| 9      | gi 2065526 gb U75698.1 KSU75698 | 8422   | 8536   | 115    | 8471       | 17     | ORF8             | DE          | 20             |
| 10     | gi 2065526 gb U75698.1 KSU75698 | 11504  | 11686  | 183    | 11553      | 14     |                  |             | 42             |
| 11     | gi 2065526 gb U75698.1 KSU75698 | 15486  | 15592  | 107    | 15540      | 17     | ORF11            | DE          | 21             |
| 12     | gi 2065526 gb U75698.1 KSU75698 | 18683  | 18830  | 148    | 18756      | 14     | vL6              | DE          | 43             |
| 13     | gi 2065526 gb U75698.1 KSU75698 | 19212  | 19311  | 100    | 19267      | 14     | K3-int           | DE          | 44             |
| 14     | gi 2065526 gb U75698.1 KSU75698 | 24265  | 24604  | 340    | 24350      | 22     |                  |             | 13             |
| 15     | gi 2065526 gb U75698.1 KSU75698 | 24265  | 24604  | 340    | 24521      | 23     |                  |             | 11             |
| 16     | gi 2065526 gb U75698.1 KSU75698 | 25316  | 25521  | 206    | 25400      | 14     |                  |             | 45             |
| 17     | gi 2065526 gb U75698.1 KSU75698 | 27765  | 27962  | 198    | 27853      | 13     | K6/K6.2/K7/PAN   | DE/DE/DE/DE | 58             |
| 18     | gi 2065526 gb U75698.1 KSU75698 | 29929  | 30142  | 214    | 30107      | 15     |                  |             | 31             |
| 19     | gi 2065526 gb U75698.1 KSU75698 | 31367  | 31466  | 100    | 31443      | 13     |                  |             | 59             |
| 20     | gi 2065526 gb U75698.1 KSU75698 | 36434  | 36533  | 100    | 36446      | 11     |                  |             | 84             |
| 21     | gi 2065526 gb U75698.1 KSU75698 | 38120  | 38219  | 100    | 38156      | 11     |                  |             | 85             |
| 22     | gi 2065526 gb U75698.1 KSU75698 | 39309  | 39483  | 175    | 39406      | 13     |                  |             | 60             |
| 23     | gi 2065526 gb U75698.1 KSU75698 | 39581  | 39685  | 105    | 39634      | 15     |                  |             | 32             |
| 24     | gi 2065526 gb U75698.1 KSU75698 | 39837  | 39959  | 123    | 39906      | 16     |                  |             | 27             |
| 25     | gi 2065526 gb U75698.1 KSU75698 | 40770  | 40873  | 104    | 40816      | 13     |                  |             | 61             |
| 26     | gi 2065526 gb U75698.1 KSU75698 | 43819  | 43922  | 104    | 43867      | 17     |                  |             | 22             |
| 27     | gi 2065526 gb U75698.1 KSU75698 | 48122  | 48221  | 100    | 48127      | 13     | ORF28            | L           | 62             |
| 28     | gi 2065526 gb U75698.1 KSU75698 | 50520  | 50683  | 164    | 50655      | 14     |                  |             | 46             |
| 29     | gi 2065526 gb U75698.1 KSU75698 | 52774  | 52876  | 103    | 52812      | 11     |                  |             | 86             |
| 30     | gi 2065526 gb U75698.1 KSU75698 | 53682  | 53798  | 117    | 53756      | 13     | ORF34            | DE          | 63             |
| 31     | gi 2065526 gb U75698.1 KSU75698 | 53918  | 54058  | 141    | 53999      | 15     | ORF34            | DE          | 33             |
| 32     | gi 2065526 gb U75698.1 KSU75698 | 56276  | 56440  | 165    | 56375      | 15     |                  |             | 34             |
| 33     | gi 2065526 gb U75698.1 KSU75698 | 57531  | 57701  | 171    | 57561      | 11     | ORF38            | DE          | 87             |
| 34     | gi 2065526 gb U75698.1 KSU75698 | 59266  | 59377  | 112    | 59305      | 12     |                  |             | 79             |
| 35     | gi 2065526 gb U75698.1 KSU75698 | 65484  | 65583  | 100    | 65531      | 15     |                  |             | 35             |
| 36     | gi 2065526 gb U75698.1 KSU75698 | 66116  | 66230  | 115    | 66173      | 15     |                  |             | 36             |
| 37     | gi 2065526 gb U75698.1 KSU75698 | 67261  | 67417  | 157    | 67340      | 14     |                  |             | 47             |
| 38     | gi 2065526 gb U75698.1 KSU75698 | 69778  | 70442  | 665    | 69850      | 14     | ORF45/45.1/50    | DE/DE/DE    | 48             |
| 39     | gi 2065526 gb U75698.1 KSU75698 | 69778  | 70442  | 665    | 70059      | 18     | ORF45.1/46-47/50 | DE/DE/DE    | 17             |
| 40     | gi 2065526 gb U75698.1 KSU75698 | 69778  | 70442  | 665    | 70283      | 20     | ORF46-47/50      | DE/DE       | 16             |
| 41     | gi 2065526 gb U75698.1 KSU75698 | 70531  | 70630  | 100    | 70615      | 13     | ORF46-47/50      | DE/DE       | 64             |
| 42     | gi 2065526 gb U75698.1 KSU75698 | 70944  | 71079  | 136    | 71015      | 14     | ORF50            | DE          | 49             |
| 43     | gi 2065526 gb U75698.1 KSU75698 | 71212  | 71657  | 446    | 71287      | 14     | ORF50            | DE          | 50             |
| 44     | gi 2065526 gb U75698.1 KSU75698 | 71212  | 71657  | 446    | 71435      | 21     | ORF50            | DE          | 14             |
| 45     | gi 2065526 gb U75698.1 KSU75698 | 71212  | 71657  | 446    | 71575      | 17     |                  |             | 23             |
| 46     | gi 2065526 gb U75698.1 KSU75698 | 71726  | 71916  | 191    | 71779      | 13     |                  |             | 65             |
| 47     | gi 2065526 gb U75698.1 KSU75698 | 72576  | 73200  | 625    | 72642      | 15     |                  |             | 37             |
| 48     | gi 2065526 gb U75698.1 KSU75698 | 72576  | 73200  | 625    | 73128      | 17     |                  |             | 24             |
| 49     | gi 2065526 gb U75698.1 KSU75698 | 73390  | 73489  | 100    | 73423      | 12     |                  |             | 80             |
| 50     | gi 2065526 gb U75698.1 KSU75698 | 73996  | 74878  | 883    | 74098      | 35     | KbZIP            | DE          | 4              |
| 51     | gi 2065526 gb U75698.1 KSU75698 | 73996  | 74878  | 883    | 74283      | 32     | KbZIP            | DE          | 5              |
| 52     | gi 2065526 gb U75698.1 KSU75698 | 73996  | 74878  | 883    | 74452      | 38     | KbZIP            | DE          | 3              |
| 53     | gi 2065526 gb U75698.1 KSU75698 | 73996  | 74878  | 883    | 74719      | 42     | ORF50AS/KbZIP    | DE          | 1              |
| 54     | gi 2065526 gb U75698.1 KSU75698 | 75155  | 75264  | 110    | 75204      | 14     | ORF50AS/K8.1     | DE/L        | 51             |
| 55     | gi 2065526 gb U75698.1 KSU75698 | 78802  | 78914  | 113    | 78858      | 13     | ORF55            | DE          | 66             |
| 56     | gi 2065526 gb U75698.1 KSU75698 | 81510  | 81760  | 251    | 81596      | 16     | ORF57            | DE          | 28             |
| 57     | gi 2065526 gb U75698.1 KSU75698 | 81828  | 81973  | 146    | 81962      | 13     | ORF57            | DE          | 67             |
| 58     | gi 2065526 gb U75698.1 KSU75698 | 83540  | 83682  | 143    | 83612      | 21     |                  |             | 15             |
| 59     | gi 2065526 gb U75698.1 KSU75698 | 86125  | 86309  | 185    | 86184      | 11     |                  |             | 88             |
| 60     | gi 2065526 gb U75698.1 KSU75698 | 88430  | 88617  | 188    | 88484      | 12     |                  |             | 81             |
| 61     | gi 2065526 gb U75698.1 KSU75698 | 90892  | 91045  | 154    | 90936      | 13     |                  |             | 68             |
| 62     | gi 2065526 gb U75698.1 KSU75698 | 92715  | 92814  | 100    | 92760      | 13     |                  |             | 69             |
| 63     | gi 2065526 gb U75698.1 KSU75698 | 92899  | 93225  | 327    | 92948      | 13     |                  |             | 70             |
| 64     | gi 2065526 gb U75698.1 KSU75698 | 92899  | 93225  | 327    | 93068      | 13     |                  |             | 71             |
| 65     | gi 2065526 gb U75698.1 KSU75698 | 98868  | 98979  | 112    | 98906      | 13     |                  |             | 72             |
| 66     | gi 2065526 gb U75698.1 KSU75698 | 99295  | 99394  | 100    | 99327      | 13     |                  |             | 73             |
| 67     | gi 2065526 gb U75698.1 KSU75698 | 104171 | 104284 | 114    | 104189     | 13     |                  |             | 74             |

|    |                                 |        |        |     |        |    |          |    |    |
|----|---------------------------------|--------|--------|-----|--------|----|----------|----|----|
| 68 | gi 2065526 gb U75698.1 KSU75698 | 107171 | 107308 | 138 | 107224 | 14 |          |    | 52 |
| 69 | gi 2065526 gb U75698.1 KSU75698 | 110780 | 110890 | 111 | 110835 | 12 |          |    | 82 |
| 70 | gi 2065526 gb U75698.1 KSU75698 | 111692 | 111794 | 103 | 111756 | 17 |          |    | 25 |
| 71 | gi 2065526 gb U75698.1 KSU75698 | 112220 | 112319 | 100 | 112281 | 15 |          |    | 38 |
| 72 | gi 2065526 gb U75698.1 KSU75698 | 112666 | 112847 | 182 | 112821 | 14 | ORF65    |    | 53 |
| 73 | gi 2065526 gb U75698.1 KSU75698 | 115937 | 116041 | 105 | 115983 | 18 |          |    | 18 |
| 74 | gi 2065526 gb U75698.1 KSU75698 | 116119 | 116277 | 159 | 116223 | 11 |          |    | 89 |
| 75 | gi 2065526 gb U75698.1 KSU75698 | 117034 | 117245 | 212 | 117068 | 11 | ORF69    | DE | 90 |
| 76 | gi 2065526 gb U75698.1 KSU75698 | 117878 | 118441 | 564 | 117932 | 16 |          |    | 29 |
| 77 | gi 2065526 gb U75698.1 KSU75698 | 117878 | 118441 | 564 | 118171 | 29 |          |    | 6  |
| 78 | gi 2065526 gb U75698.1 KSU75698 | 117878 | 118441 | 564 | 118307 | 28 |          |    | 8  |
| 79 | gi 2065526 gb U75698.1 KSU75698 | 118895 | 119015 | 121 | 118944 | 14 | K12      | L  | 54 |
| 80 | gi 2065526 gb U75698.1 KSU75698 | 122562 | 122669 | 108 | 122613 | 13 |          |    | 75 |
| 81 | gi 2065526 gb U75698.1 KSU75698 | 123722 | 123866 | 145 | 123766 | 12 |          |    | 83 |
| 82 | gi 2065526 gb U75698.1 KSU75698 | 124500 | 125244 | 745 | 124659 | 23 | ORF71-72 | DE | 12 |
| 83 | gi 2065526 gb U75698.1 KSU75698 | 124500 | 125244 | 745 | 124863 | 40 |          |    | 2  |
| 84 | gi 2065526 gb U75698.1 KSU75698 | 125294 | 125481 | 188 | 125368 | 18 |          |    | 19 |
| 85 | gi 2065526 gb U75698.1 KSU75698 | 125621 | 126468 | 848 | 125737 | 29 |          |    | 7  |
| 86 | gi 2065526 gb U75698.1 KSU75698 | 125621 | 126468 | 848 | 125951 | 28 |          |    | 9  |
| 87 | gi 2065526 gb U75698.1 KSU75698 | 125621 | 126468 | 848 | 126218 | 26 |          |    | 10 |
| 88 | gi 2065526 gb U75698.1 KSU75698 | 128393 | 128521 | 129 | 128450 | 15 | ORF73    | DE | 39 |
| 89 | gi 2065526 gb U75698.1 KSU75698 | 129354 | 129453 | 100 | 129434 | 13 |          |    | 76 |
| 90 | gi 2065526 gb U75698.1 KSU75698 | 129756 | 129855 | 100 | 129805 | 14 |          |    | 55 |
| 91 | gi 2065526 gb U75698.1 KSU75698 | 130761 | 130860 | 100 | 130790 | 11 |          |    | 91 |

Table S1C. RBP-Jk (-VPA) peaks

| Peak # | chr        | start | end   | length | abs_summit | pileup | Promoter       | Kinetics    | Rank by Height |
|--------|------------|-------|-------|--------|------------|--------|----------------|-------------|----------------|
| 1      | gi 2065526 | 484   | 583   | 100    | 577        | 8      | ORF4           | DE          | 40             |
| 2      | gi 2065526 | 859   | 1043  | 185    | 951        | 12     | ORF4           | DE          | 5              |
| 3      | gi 2065526 | 1191  | 1417  | 227    | 1352       | 10     |                |             | 11             |
| 4      | gi 2065526 | 2730  | 2853  | 124    | 2779       | 6      | ORF6           | DE          | 90             |
| 5      | gi 2065526 | 3418  | 3517  | 100    | 3469       | 7      |                |             | 68             |
| 6      | gi 2065526 | 5185  | 5477  | 293    | 5377       | 9      |                |             | 23             |
| 7      | gi 2065526 | 6805  | 6904  | 100    | 6885       | 8      |                |             | 41             |
| 8      | gi 2065526 | 7487  | 7635  | 149    | 7544       | 10     |                |             | 12             |
| 9      | gi 2065526 | 8276  | 8406  | 131    | 8316       | 9      | ORF8           | DE          | 24             |
| 10     | gi 2065526 | 9329  | 9428  | 100    | 9362       | 8      |                |             | 42             |
| 11     | gi 2065526 | 9475  | 9756  | 282    | 9585       | 13     |                |             | 2              |
| 12     | gi 2065526 | 14000 | 14160 | 161    | 14084      | 8      |                |             | 43             |
| 13     | gi 2065526 | 16325 | 16449 | 125    | 16389      | 10     |                |             | 13             |
| 14     | gi 2065526 | 16595 | 16694 | 100    | 16670      | 8      |                |             | 44             |
| 15     | gi 2065526 | 17276 | 17486 | 211    | 17377      | 10     |                |             | 14             |
| 16     | gi 2065526 | 18421 | 18520 | 100    | 18499      | 6      | vIL6           | DE          | 91             |
| 17     | gi 2065526 | 19553 | 19728 | 176    | 19618      | 9      | K3-int         |             | 25             |
| 18     | gi 2065526 | 20302 | 20406 | 105    | 20355      | 10     | ORF70-K3       | DE          | 15             |
| 19     | gi 2065526 | 21287 | 21488 | 202    | 21336      | 8      |                |             | 45             |
| 20     | gi 2065526 | 25112 | 25220 | 109    | 25172      | 7      |                |             | 69             |
| 21     | gi 2065526 | 27774 | 27873 | 100    | 27829      | 7      | K6/K6.2/K7/PAN | DE/DE/DE/DE | 70             |
| 22     | gi 2065526 | 28282 | 28381 | 100    | 28365      | 6      | K6/K6.2/PAN    | DE/DE       | 92             |
| 23     | gi 2065526 | 29003 | 29256 | 254    | 29199      | 10     | ORF16          | DE          | 16             |
| 24     | gi 2065526 | 29453 | 29619 | 167    | 29508      | 8      | ORF16          | DE          | 46             |
| 25     | gi 2065526 | 35840 | 35982 | 143    | 35904      | 7      |                |             | 71             |
| 26     | gi 2065526 | 36346 | 36564 | 219    | 36415      | 10     |                |             | 17             |
| 27     | gi 2065526 | 36762 | 36933 | 172    | 36828      | 12     |                |             | 6              |
| 28     | gi 2065526 | 37493 | 37592 | 100    | 37563      | 7      |                |             | 72             |
| 29     | gi 2065526 | 38852 | 38977 | 126    | 38907      | 9      |                |             | 26             |
| 30     | gi 2065526 | 43575 | 43708 | 134    | 43688      | 8      |                |             | 47             |
| 31     | gi 2065526 | 44229 | 44345 | 117    | 44279      | 11     |                |             | 9              |
| 32     | gi 2065526 | 44610 | 44741 | 132    | 44661      | 6      |                |             | 93             |
| 33     | gi 2065526 | 46744 | 46892 | 149    | 46819      | 9      | ORF26/27       | L/L         | 27             |
| 34     | gi 2065526 | 47932 | 48183 | 252    | 48013      | 8      | ORF28          | L           | 48             |
| 35     | gi 2065526 | 49545 | 49673 | 129    | 49593      | 7      |                |             | 73             |
| 36     | gi 2065526 | 50435 | 50691 | 257    | 50620      | 9      |                |             | 28             |
| 37     | gi 2065526 | 53127 | 53226 | 100    | 53183      | 8      |                |             | 49             |
| 38     | gi 2065526 | 56940 | 57128 | 189    | 57068      | 8      |                |             | 50             |
| 39     | gi 2065526 | 57727 | 57847 | 121    | 57778      | 10     | ORF38          | DE          | 18             |
| 40     | gi 2065526 | 58784 | 59007 | 224    | 58932      | 9      |                |             | 29             |
| 41     | gi 2065526 | 59671 | 59772 | 102    | 59720      | 6      |                |             | 94             |
| 42     | gi 2065526 | 60048 | 60242 | 195    | 60134      | 7      |                |             | 74             |
| 43     | gi 2065526 | 60759 | 60858 | 100    | 60838      | 7      | ORF39          | DE          | 75             |
| 44     | gi 2065526 | 62267 | 62369 | 103    | 62316      | 9      |                |             | 30             |
| 45     | gi 2065526 | 63938 | 64148 | 211    | 64076      | 8      |                |             | 51             |
| 46     | gi 2065526 | 64383 | 64558 | 176    | 64532      | 8      |                |             | 52             |
| 47     | gi 2065526 | 65705 | 65914 | 210    | 65753      | 8      |                |             | 53             |
| 48     | gi 2065526 | 66284 | 66383 | 100    | 66328      | 10     |                |             | 19             |
| 49     | gi 2065526 | 66892 | 67021 | 130    | 66971      | 8      |                |             | 54             |
| 50     | gi 2065526 | 67060 | 67186 | 127    | 67120      | 6      |                |             | 95             |
| 51     | gi 2065526 | 69436 | 69628 | 193    | 69497      | 9      | ORF45/45.1/50  | DE/DE/DE    | 31             |
| 52     | gi 2065526 | 69996 | 70360 | 365    | 70145      | 12     | ORF46-57/50    | DE/DE       | 7              |
| 53     | gi 2065526 | 70795 | 70981 | 187    | 70880      | 9      | ORF46-57/50    | DE/DE       | 32             |
| 54     | gi 2065526 | 71288 | 71533 | 246    | 71443      | 9      | ORF50          | DE          | 33             |
| 55     | gi 2065526 | 72294 | 72503 | 210    | 72446      | 7      |                |             | 76             |



|               |        |        |     |        |    |               |       |    |
|---------------|--------|--------|-----|--------|----|---------------|-------|----|
| 56 gi 2065526 | 72787  | 72886  | 100 | 72834  | 9  |               |       | 34 |
| 57 gi 2065526 | 73996  | 74141  | 146 | 74072  | 8  | KbZIP         | DE    | 55 |
| 58 gi 2065526 | 74376  | 74552  | 177 | 74470  | 8  | KbZIP         | DE    | 56 |
| 59 gi 2065526 | 74641  | 74925  | 285 | 74757  | 18 | ORF50AS/KbZIP | DE/DE | 1  |
| 60 gi 2065526 | 75044  | 75185  | 142 | 75124  | 7  | ORF50AS/K8.1  | DE/DE | 77 |
| 61 gi 2065526 | 76532  | 76713  | 182 | 76628  | 7  |               |       | 78 |
| 62 gi 2065526 | 79032  | 79145  | 114 | 79080  | 7  | ORF55         | DE    | 79 |
| 63 gi 2065526 | 81087  | 81221  | 135 | 81171  | 7  | ORF57         | DE    | 80 |
| 64 gi 2065526 | 83159  | 83280  | 122 | 83228  | 8  |               |       | 57 |
| 65 gi 2065526 | 83604  | 83738  | 135 | 83669  | 8  |               |       | 58 |
| 66 gi 2065526 | 85539  | 85679  | 141 | 85625  | 7  |               |       | 81 |
| 67 gi 2065526 | 88647  | 88809  | 163 | 88747  | 8  |               |       | 59 |
| 68 gi 2065526 | 89599  | 89729  | 131 | 89648  | 6  |               |       | 96 |
| 69 gi 2065526 | 89872  | 90070  | 199 | 89941  | 7  |               |       | 82 |
| 70 gi 2065526 | 92583  | 92712  | 130 | 92643  | 10 |               |       | 20 |
| 71 gi 2065526 | 93076  | 93184  | 109 | 93125  | 8  |               |       | 60 |
| 72 gi 2065526 | 93514  | 93613  | 100 | 93542  | 8  |               |       | 61 |
| 73 gi 2065526 | 95118  | 95279  | 162 | 95204  | 12 |               |       | 8  |
| 74 gi 2065526 | 98078  | 98197  | 120 | 98143  | 9  |               |       | 35 |
| 75 gi 2065526 | 98258  | 98526  | 269 | 98330  | 10 |               |       | 21 |
| 76 gi 2065526 | 98568  | 98775  | 208 | 98620  | 8  |               |       | 62 |
| 77 gi 2065526 | 99643  | 99760  | 118 | 99693  | 7  |               |       | 83 |
| 78 gi 2065526 | 102872 | 102999 | 128 | 102932 | 7  |               |       | 84 |
| 79 gi 2065526 | 103101 | 103315 | 215 | 103235 | 11 |               |       | 10 |
| 80 gi 2065526 | 105405 | 105504 | 100 | 105476 | 8  |               |       | 63 |
| 81 gi 2065526 | 111210 | 111353 | 144 | 111286 | 7  |               |       | 85 |
| 82 gi 2065526 | 111576 | 111734 | 159 | 111653 | 9  |               |       | 36 |
| 83 gi 2065526 | 112334 | 112453 | 120 | 112385 | 10 |               |       | 22 |
| 84 gi 2065526 | 116012 | 116111 | 100 | 116076 | 7  |               |       | 86 |
| 85 gi 2065526 | 117218 | 117415 | 198 | 117307 | 7  |               |       | 87 |
| 86 gi 2065526 | 118253 | 118355 | 103 | 118301 | 8  |               |       | 64 |
| 87 gi 2065526 | 124750 | 125022 | 273 | 124888 | 13 |               |       | 3  |
| 88 gi 2065526 | 126099 | 126198 | 100 | 126145 | 6  |               |       | 97 |
| 89 gi 2065526 | 126724 | 126923 | 200 | 126806 | 8  |               |       | 65 |
| 90 gi 2065526 | 128359 | 128483 | 125 | 128392 | 8  | ORF73         | DE    | 66 |
| 91 gi 2065526 | 128759 | 128874 | 116 | 128824 | 9  | ORF73         | DE    | 37 |
| 92 gi 2065526 | 129364 | 129463 | 100 | 129407 | 7  |               |       | 88 |
| 93 gi 2065526 | 129701 | 129811 | 111 | 129777 | 8  |               |       | 67 |
| 94 gi 2065526 | 130096 | 130195 | 100 | 130143 | 9  |               |       | 38 |
| 95 gi 2065526 | 131369 | 131468 | 100 | 131444 | 7  |               |       | 89 |
| 96 gi 2065526 | 132435 | 132666 | 232 | 132576 | 9  |               |       | 39 |
| 97 gi 2065526 | 137377 | 137508 | 132 | 137469 | 13 |               |       | 4  |

Table S1D. Rta (+VPA) and RBP-Jk peaks: co-localized or in same promoters

| Rta (+VPA) |            |                  |          | RBP-Jk (+VPA) |            |                  |          | RBP-Jk (-VPA) |            |               |          |
|------------|------------|------------------|----------|---------------|------------|------------------|----------|---------------|------------|---------------|----------|
| Peak #     | abs_summit | Promoter         | Kinetics | Peak #        | abs_summit | Promoter         | Kinetics | Peak #        | abs_summit | Promoter      | Kinetics |
| 5          | 2716       | ORF6             | DE       | 3             | 2704       | ORF6             | DE       |               |            |               |          |
| 9          | 6158       |                  |          | 6             | 6139       |                  |          |               |            |               |          |
| 21         | 28355      | K6/K6.2/PAN      | DE/DE/DE |               |            |                  |          | 22            | 28365      | K6/K6.2/PAN   | DE/DE/DE |
| 25         | 30125      |                  |          | 18            | 30107      |                  |          |               |            |               |          |
| 30         | 39611      |                  |          | 23            | 39634      |                  |          |               |            |               |          |
| 51         | 70086      | ORF45.1/46-47/50 | DE/DE/DE | 39            | 70059      | ORF45.1/46-47/50 | DE/DE/DE |               |            |               |          |
| 52         | 70284      | ORF46-47/50      | DE/DE    | 40            | 70283      | ORF46-47/50      | DE/DE    |               |            |               |          |
| 53         | 71004      | ORF50            | DE       | 42            | 71015      | ORF50            | DE       |               |            |               |          |
| 54         | 71410      | ORF50            | DE       | 44            | 71435      | ORF50            | DE       | 54            | 71443      | ORF50         | DE       |
| 57         | 74720      | ORF50AS/KbZIP    | DE/DE    | 53            | 74719      | ORF50AS/KbZIP    | DE/DE    | 59            | 74757      | ORF50AS/KbZIP | DE/DE    |
| 58         | 75151      | ORF50AS/K8.1     | DE/L     |               |            |                  |          | 60            | 75124      | ORF50AS/K8.1  | DE/L     |
| 64         | 81901      | ORF57            | DE       | 57            | 81962      | ORF57            | DE       |               |            |               |          |
| 69         | 92700      |                  |          |               |            |                  |          | 70            | 92643      |               |          |
| 90         | 118176     |                  |          | 77            | 118171     |                  |          |               |            |               |          |
| 98         | 124873     |                  |          | 83            | 124863     |                  |          | 87            | 124888     |               |          |
| 100        | 125758     |                  |          | 85            | 125737     |                  |          |               |            |               |          |

Green font=RBP-Jk increased in reactivation  
 Red font=RBP-Jk decreased in reactivation

Same promoter but not co-localized

|     |        |               |          |    |        |                |             |    |        |       |    |
|-----|--------|---------------|----------|----|--------|----------------|-------------|----|--------|-------|----|
| 15  | 18302  | vIL6          | DE       | 12 | 18756  | vIL6           | DE          |    |        |       |    |
| 22  | 28617  | K6/PAN        | DE/DE    | 17 | 27853  | K6/K6.2/K7/PAN | DE/DE/DE/DE |    |        |       |    |
| 49  | 69005  | ORF45/50      | DE/DE    |    |        |                |             |    |        |       |    |
| 50  | 69618  | ORF45/45.1/50 | DE/DE/DE | 38 | 69850  | ORF45/45.1/50  | DE/DE/DE    |    |        |       |    |
| 92  | 119190 | K12           | L        | 79 | 118944 | K12            | L           |    |        |       |    |
| 102 | 128326 | ORF73         | DE       | 88 | 128450 | ORF73          | DE          | 90 | 128392 | ORF73 | DE |
|     |        |               |          |    |        |                |             | 91 | 128824 | ORF73 | DE |

**Table S2. Classification of RBP-Jk peaks in latency and reactivation of KSHV: data.** Green text=RBP-Jk peak increased in reactivation, red text=RBP-Jk peak decreased in reactivation. Abbreviations: abs\_summit=peak summit, pileup=height in read depth of peak summit, fold change in pileup=reactivation (+VPA) pileup/latency (-VPA) pileup, used to determine classifications for latency/reactivation peaks. RBP-Jk class # corresponds to Table 2.

Table S2. Classification of RBP-Jk peaks

| RBP-Jk (VPA-) |            |        |                |             |  | RBP-Jk (VPA+) Peak |            |        |                |             |            | RBP-Jk Class |   |
|---------------|------------|--------|----------------|-------------|--|--------------------|------------|--------|----------------|-------------|------------|--------------|---|
| Peak #        | abs_summit | pileup | Promoter       | Kinetics    |  | #                  | abs_summit | pileup | Promoter       | Kinetics    | # -VPA SDs |              | # |
| 1             | 577        | 8      | ORF4           | DE          |  |                    |            |        |                |             |            |              | 5 |
| 2             | 951        | 12     | ORF4           | DE          |  |                    |            |        |                |             |            |              | 5 |
| 3             | 1352       | 10     |                |             |  |                    |            |        |                |             |            |              | 5 |
|               |            |        |                |             |  | 1                  | 1687       | 12     |                |             |            |              | 2 |
|               |            |        |                |             |  | 2                  | 2295       | 13     | ORF6           | DE          |            |              | 2 |
|               |            |        |                |             |  | 3                  | 2704       | 12     | ORF6           | DE          |            |              | 2 |
| 4             | 2779       | 6      | ORF6           | DE          |  |                    |            |        |                |             |            |              | 5 |
| 5             | 3469       | 7      |                |             |  |                    |            |        |                |             |            |              | 5 |
|               |            |        |                |             |  | 4                  | 4508       | 14     |                |             |            |              | 2 |
|               |            |        |                |             |  | 5                  | 4837       | 14     |                |             |            |              | 2 |
| 6             | 5377       | 9      |                |             |  |                    |            |        |                |             |            |              | 5 |
|               |            |        |                |             |  | 6                  | 6139       | 16     |                |             |            |              | 2 |
|               |            |        |                |             |  | 7                  | 6346       | 13     |                |             |            |              | 2 |
| 7             | 6885       | 8      |                |             |  |                    |            |        |                |             |            |              | 5 |
| 8             | 7544       | 10     |                |             |  |                    |            |        |                |             |            |              | 5 |
| 9             | 8316       | 9      | ORF8           | DE          |  | 8                  | 8294       | 15     | ORF8           | DE          | -0.41      |              | 1 |
|               |            |        |                |             |  | 9                  | 8471       | 17     | ORF8           | DE          |            |              | 2 |
| 10            | 9362       | 8      |                |             |  |                    |            |        |                |             |            |              | 5 |
| 11            | 9585       | 13     |                |             |  |                    |            |        |                |             |            |              | 5 |
| 12            | 14084      | 8      |                |             |  | 10                 | 11553      | 14     |                |             |            |              | 2 |
|               |            |        |                |             |  | 11                 | 15540      | 17     | ORF11          | DE          |            |              | 5 |
| 13            | 16389      | 10     |                |             |  |                    |            |        |                |             |            |              | 2 |
| 14            | 16670      | 8      |                |             |  |                    |            |        |                |             |            |              | 5 |
| 15            | 17377      | 10     |                |             |  |                    |            |        |                |             |            |              | 5 |
| 16            | 18499      | 6      | vIL6           | DE          |  |                    |            |        |                |             |            |              | 5 |
|               |            |        |                |             |  | 12                 | 18756      | 14     | vIL6           | DE          |            |              | 2 |
|               |            |        |                |             |  | 13                 | 19267      | 14     | K3-int         | DE          |            |              | 2 |
| 17            | 19618      | 9      | K3-int         | DE          |  |                    |            |        |                |             |            |              | 5 |
| 18            | 20355      | 10     | ORF70-K3       | DE          |  |                    |            |        |                |             |            |              | 5 |
| 19            | 21336      | 8      |                |             |  |                    |            |        |                |             |            |              | 5 |
|               |            |        |                |             |  | 14                 | 24350      | 22     |                |             |            |              | 2 |
|               |            |        |                |             |  | 15                 | 24521      | 23     |                |             |            |              | 2 |
| 20            | 25172      | 7      |                |             |  |                    |            |        |                |             |            |              | 5 |
|               |            |        |                |             |  | 16                 | 25400      | 14     |                |             |            |              | 2 |
| 21            | 27829      | 7      | K6/K6.2/K7/PAN | DE/DE/DE/DE |  | 17                 | 27853      | 13     | K6/K6.2/K7/PAN | DE/DE/DE/DE | -0.08      |              | 1 |
| 22            | 28365      | 6      | K6/K6.2/PAN    | DE/DE       |  |                    |            |        |                |             |            |              | 5 |
| 23            | 29199      | 10     | ORF16          | DE          |  |                    |            |        |                |             |            |              | 5 |
| 24            | 29508      | 8      | ORF16          | DE          |  |                    |            |        |                |             |            |              | 5 |
|               |            |        |                |             |  | 18                 | 30107      | 15     |                |             |            |              | 2 |
|               |            |        |                |             |  | 19                 | 31443      | 13     |                |             |            |              | 2 |
| 25            | 35904      | 7      |                |             |  |                    |            |        |                |             |            |              | 5 |
| 26            | 36415      | 10     |                |             |  | 20                 | 36446      | 11     |                |             | -1.60      |              | 4 |
| 27            | 36828      | 12     |                |             |  |                    |            |        |                |             |            |              | 5 |
| 28            | 37563      | 7      |                |             |  |                    |            |        |                |             |            |              | 5 |
|               |            |        |                |             |  | 21                 | 38156      | 11     |                |             |            |              | 2 |
|               |            |        |                |             |  | 22                 | 39406      | 13     |                |             |            |              | 2 |
| 29            | 38907      | 9      |                |             |  |                    |            |        |                |             |            |              | 5 |
|               |            |        |                |             |  | 23                 | 39634      | 15     |                |             |            |              | 2 |
|               |            |        |                |             |  | 24                 | 39906      | 16     |                |             |            |              | 2 |
|               |            |        |                |             |  | 25                 | 40816      | 13     |                |             |            |              | 2 |
|               |            |        |                |             |  | 26                 | 43867      | 17     |                |             |            |              | 5 |
| 30            | 43688      | 8      |                |             |  |                    |            |        |                |             |            |              | 2 |
| 31            | 44279      | 11     |                |             |  |                    |            |        |                |             |            |              | 5 |
| 32            | 44661      | 6      |                |             |  |                    |            |        |                |             |            |              | 5 |
| 33            | 46819      | 9      | ORF26/27       | L/L         |  |                    |            |        |                |             |            |              | 5 |
| 34            | 48013      | 8      | ORF28          | L           |  |                    |            |        |                |             |            |              | 5 |
|               |            |        |                |             |  | 27                 | 48127      | 13     | ORF28          | L           |            |              | 2 |
| 35            | 49593      | 7      |                |             |  |                    |            |        |                |             |            |              | 5 |
| 36            | 50620      | 9      |                |             |  | 28                 | 50655      | 14     |                |             | -0.62      |              | 1 |
|               |            |        |                |             |  | 29                 | 52812      | 11     |                |             |            |              | 2 |
| 37            | 53183      | 8      |                |             |  |                    |            |        |                |             |            |              | 5 |
|               |            |        |                |             |  | 30                 | 53756      | 13     | ORF34          | DE          |            |              | 2 |
|               |            |        |                |             |  | 31                 | 53999      | 15     | ORF34          | DE          |            |              | 2 |
|               |            |        |                |             |  | 32                 | 56375      | 15     |                |             |            |              | 2 |
| 38            | 57068      | 8      |                |             |  |                    |            |        |                |             |            |              | 5 |
|               |            |        |                |             |  | 33                 | 57561      | 11     | ORF38          | DE          |            |              | 2 |
| 39            | 57778      | 10     | ORF38          | DE          |  |                    |            |        |                |             |            |              | 5 |
| 40            | 58932      | 9      |                |             |  |                    |            |        |                |             |            |              | 5 |
|               |            |        |                |             |  | 34                 | 59305      | 12     |                |             |            |              | 2 |
| 41            | 59720      | 6      |                |             |  |                    |            |        |                |             |            |              | 5 |
| 42            | 60134      | 7      |                |             |  |                    |            |        |                |             |            |              | 5 |

|    |        |    |               |          |    |        |    |                  |          |       |   |
|----|--------|----|---------------|----------|----|--------|----|------------------|----------|-------|---|
| 43 | 60838  | 7  | ORF39         | DE       |    |        |    |                  |          |       | 5 |
| 44 | 62316  | 9  |               |          |    |        |    |                  |          |       | 5 |
| 45 | 64076  | 8  |               |          |    |        |    |                  |          |       | 5 |
| 46 | 64532  | 8  |               |          |    |        |    |                  |          |       | 5 |
|    |        |    |               |          | 35 | 65531  | 15 |                  |          |       | 2 |
| 47 | 65753  | 8  |               |          |    |        |    |                  |          |       | 5 |
|    |        |    |               |          | 36 | 66173  | 15 |                  |          |       | 2 |
| 48 | 66328  | 10 |               |          |    |        |    |                  |          |       | 5 |
| 49 | 66971  | 8  |               |          |    |        |    |                  |          |       | 5 |
| 50 | 67120  | 6  |               |          |    |        |    |                  |          |       | 5 |
|    |        |    |               |          | 37 | 67340  | 14 |                  |          |       | 2 |
| 51 | 69497  | 9  | ORF45/45.1/50 | DE/DE/DE | 38 | 69850  | 14 | ORF45/45.1/50    | DE/DE/DE |       | 5 |
|    |        |    |               |          | 39 | 70059  | 18 | ORF45.1/46-47/50 | DE/DE/DE |       | 2 |
| 52 | 70145  | 12 | ORF46-47/50   | DE/DE    |    |        |    |                  |          |       | 5 |
|    |        |    |               |          | 40 | 70283  | 20 | ORF46-47/50      | DE/DE    |       | 2 |
|    |        |    |               |          | 41 | 70615  | 13 | ORF46-47/50      | DE/DE    |       | 2 |
| 53 | 70880  | 9  | ORF46-47/50   | DE/DE    |    |        |    |                  |          |       | 5 |
|    |        |    |               |          | 42 | 71015  | 14 | ORF50            | DE       |       | 2 |
|    |        |    |               |          | 43 | 71287  | 14 | ORF50            | DE       |       | 2 |
| 54 | 71443  | 9  | ORF50         | DE       | 44 | 71435  | 21 | ORF50            | DE       | -0.81 | 1 |
|    |        |    |               |          | 45 | 71575  | 17 |                  |          |       | 2 |
|    |        |    |               |          | 46 | 71779  | 13 |                  |          |       | 2 |
| 55 | 72446  | 7  |               |          |    |        |    |                  |          |       | 5 |
|    |        |    |               |          | 47 | 72642  | 15 |                  |          |       | 2 |
| 56 | 72834  | 9  |               |          |    |        |    |                  |          |       | 5 |
|    |        |    |               |          | 48 | 73128  | 17 |                  |          |       | 2 |
|    |        |    |               |          | 49 | 73423  | 12 |                  |          |       | 2 |
| 57 | 74072  | 8  | KbZIP         | DE       | 50 | 74098  | 35 | KbZIP            | DE       | 4.04  | 3 |
|    |        |    |               |          | 51 | 74283  | 32 | KbZIP            | DE       |       | 2 |
| 58 | 74470  | 8  | KbZIP         | DE       | 52 | 74452  | 38 | KbZIP            | DE       | 4.65  | 3 |
| 59 | 74757  | 18 | ORF50AS/KbZIP | DE/DE    | 53 | 74719  | 42 | ORF50AS/KbZIP    | DE       | 1.79  | 3 |
| 60 | 75124  | 7  | ORF50AS/K8.1  | DE/DE    |    |        |    |                  |          |       | 5 |
|    |        |    |               |          | 54 | 75204  | 14 | ORF50AS/K8.1     | DE/L     |       | 2 |
| 61 | 76628  | 7  |               |          |    |        |    |                  |          |       | 5 |
|    |        |    |               |          | 55 | 78858  | 13 | ORF55            | DE       |       | 2 |
| 62 | 79080  | 7  | ORF55         | DE       |    |        |    |                  |          |       | 5 |
| 63 | 81171  | 7  | ORF57         | DE       |    |        |    |                  |          |       | 5 |
|    |        |    |               |          | 56 | 81596  | 16 | ORF57            | DE       |       | 2 |
|    |        |    |               |          | 57 | 81962  | 13 | ORF57            | DE       |       | 2 |
| 64 | 83228  | 8  |               |          |    |        |    |                  |          |       | 5 |
| 65 | 83669  | 8  |               |          | 58 | 83612  | 21 |                  |          | 1.18  | 3 |
| 66 | 85625  | 7  |               |          |    |        |    |                  |          |       | 5 |
|    |        |    |               |          | 59 | 86184  | 11 |                  |          |       | 2 |
|    |        |    |               |          | 60 | 88484  | 12 |                  |          |       | 2 |
| 67 | 88747  | 8  |               |          |    |        |    |                  |          |       | 5 |
| 68 | 89648  | 6  |               |          |    |        |    |                  |          |       | 5 |
| 69 | 89941  | 7  |               |          |    |        |    |                  |          |       | 5 |
|    |        |    |               |          | 61 | 90936  | 13 |                  |          |       | 2 |
| 70 | 92643  | 10 |               |          |    |        |    |                  |          |       | 5 |
|    |        |    |               |          | 62 | 92760  | 13 |                  |          |       | 2 |
|    |        |    |               |          | 63 | 92948  | 13 |                  |          |       | 2 |
| 71 | 93125  | 8  |               |          | 64 | 93068  | 13 |                  |          | -0.45 | 1 |
| 72 | 93542  | 8  |               |          |    |        |    |                  |          |       | 5 |
| 73 | 95204  | 12 |               |          |    |        |    |                  |          |       | 5 |
| 74 | 98143  | 9  |               |          |    |        |    |                  |          |       | 5 |
| 75 | 98330  | 10 |               |          |    |        |    |                  |          |       | 5 |
| 76 | 98620  | 8  |               |          |    |        |    |                  |          |       | 5 |
|    |        |    |               |          | 65 | 98906  | 13 |                  |          |       | 2 |
|    |        |    |               |          | 66 | 99327  | 13 |                  |          |       | 2 |
| 77 | 99693  | 7  |               |          |    |        |    |                  |          |       | 5 |
| 78 | 102932 | 7  |               |          |    |        |    |                  |          |       | 5 |
| 79 | 103235 | 11 |               |          |    |        |    |                  |          |       | 5 |
|    |        |    |               |          | 67 | 104189 | 13 |                  |          |       | 2 |
| 80 | 105476 | 8  |               |          |    |        |    |                  |          |       | 5 |
|    |        |    |               |          | 68 | 107224 | 14 |                  |          |       | 2 |
|    |        |    |               |          | 69 | 110835 | 12 |                  |          |       | 2 |
| 81 | 111286 | 7  |               |          |    |        |    |                  |          |       | 5 |
| 82 | 111653 | 9  |               |          |    |        |    |                  |          |       | 5 |
|    |        |    |               |          | 70 | 111756 | 17 |                  |          |       | 2 |
|    |        |    |               |          | 71 | 112281 | 15 |                  |          |       | 2 |
| 83 | 112385 | 10 |               |          |    |        |    |                  |          |       | 5 |
|    |        |    |               |          | 72 | 112821 | 14 | ORF65            | L        |       | 2 |
|    |        |    |               |          | 73 | 115983 | 18 |                  |          |       | 2 |
| 84 | 116076 | 7  |               |          |    |        |    |                  |          |       | 5 |
|    |        |    |               |          | 74 | 116223 | 11 |                  |          |       | 2 |

|    |        |    |       |    |    |        |    |          |    |       |   |
|----|--------|----|-------|----|----|--------|----|----------|----|-------|---|
| 85 | 117307 | 7  |       |    | 75 | 117068 | 11 | ORF69    | DE |       | 2 |
|    |        |    |       |    |    |        |    |          |    |       | 5 |
|    |        |    |       |    | 76 | 117932 | 16 |          |    |       | 2 |
|    |        |    |       |    | 77 | 118171 | 29 |          |    |       | 2 |
| 86 | 118301 | 8  |       |    | 78 | 118307 | 28 |          |    | 2.60  | 3 |
|    |        |    |       |    | 79 | 118944 | 14 | K12      | L  |       | 2 |
|    |        |    |       |    | 80 | 122613 | 13 |          |    |       | 2 |
|    |        |    |       |    | 81 | 123766 | 12 |          |    |       | 2 |
|    |        |    |       |    | 82 | 124659 | 23 | ORF71-72 | DE |       | 2 |
| 87 | 124888 | 13 |       |    | 83 | 124863 | 40 |          |    | 3.22  | 3 |
|    |        |    |       |    | 84 | 125368 | 18 |          |    |       | 2 |
|    |        |    |       |    | 85 | 125737 | 29 |          |    |       | 2 |
|    |        |    |       |    | 86 | 125951 | 28 |          |    |       | 2 |
| 88 | 126145 | 6  |       |    |    |        |    |          |    |       | 5 |
|    |        |    |       |    | 87 | 126218 | 26 |          |    |       | 2 |
| 89 | 126806 | 8  |       |    |    |        |    |          |    |       | 5 |
| 90 | 128392 | 8  | ORF73 | DE | 88 | 128450 | 15 | ORF73    | DE | -0.04 | 1 |
| 91 | 128824 | 9  | ORF73 | DE |    |        |    |          |    |       | 5 |
| 92 | 129407 | 7  |       |    | 89 | 129434 | 13 |          |    | -0.08 | 1 |
| 93 | 129777 | 8  |       |    | 90 | 129805 | 14 |          |    | -0.25 | 1 |
| 94 | 130143 | 9  |       |    |    |        |    |          |    |       | 5 |
|    |        |    |       |    | 91 | 130790 | 11 |          |    |       | 2 |
| 95 | 131444 | 7  |       |    |    |        |    |          |    |       | 5 |
| 96 | 132576 | 9  |       |    |    |        |    |          |    |       | 5 |
| 97 | 137469 | 13 |       |    |    |        |    |          |    |       | 5 |

Table S3. Orphan Motifs over-represented at RBP-Jk peaks at early promoters

|                                | Orphan motif <sup>d</sup> |               |               |                |                 |                |
|--------------------------------|---------------------------|---------------|---------------|----------------|-----------------|----------------|
|                                | 1                         | 2             | 3             | 4              | 5               | 6              |
| Jk 2/<br>Jk 5 <sup>a</sup>     | 6.7<br>(0.018)            | 5.8<br>(0.03) | 5.7<br>(4e-7) | 2.6<br>(0.006) | -3.2<br>(0.006) | -2.6<br>(0.03) |
| Jk 2+Rta/<br>Jk 2 <sup>b</sup> | 2.2<br>(0.018)            | 1.5<br>(0.47) | 0<br>(4e-6)   | 2.9<br>(0.08)  | 1.2<br>(0.41)   | 0<br>(0.06)    |
| # of promoters <sup>c</sup>    | 7                         | 6             | 12            | 6              | 15              | 10             |

<sup>a</sup> number of motifs <61 bp to RBP-Jk Class 2 peak (“Jk2”) divided by number of motifs <61 bp to RBP-Jk Class 5 (“Jk5”) peak in early promoters, expressed as fold relative to actual ratio of Jk2/Jk5 peaks, which was 1.2. Number in parentheses is Z-test p value compared to observed ratio of peaks.

<sup>b</sup> number of motifs <61 bp to RBP-Jk Class 2 peak/Rta peak (“Jk2+Rta”) divided by number of motifs <61 bp to RBP-Jk Class 2 (“Jk2”) peak in early promoters, expressed as fold relative to actual ratio of Jk2+Rta/Rta peaks, which was 0.28. Number in parentheses is Z-test p value compared to observed ratio of peaks; “NA”=not applicable

<sup>c</sup> number of promoters with co-localized Class 2 or Class 5 RBP-Jk peak

<sup>d</sup> Orphan motifs numbered consecutively.

Table S4. Localization of dual Rta-c/POU Motifs at RBP-Jk and Rta peaks at early promoters

|                                | Rta-c Motif + POU Motif <sup>d</sup> |       |        |       |        |
|--------------------------------|--------------------------------------|-------|--------|-------|--------|
|                                | POU2F3                               | P5F1B | POU3F4 | Oct-v | POU4F2 |
| Jk 2/<br>Jk 5 <sup>a</sup>     | inf                                  | inf   | inf    | 12.3  | 1.1    |
| Jk 2+Rta/<br>Jk 2 <sup>b</sup> | 3.8                                  | null  | 1.6    | 3.0   | 2.3    |
| # of promoters <sup>c</sup>    | 4                                    | 1     | 2      | 7     | 5      |

<sup>a</sup> number of Rta-c/POU motifs <61 bp to RBP-Jk Class 2 (“Jk2”) peaks divided by number of motifs <61 bp to RBP-Jk Class 5 peaks (“Jk5”) in early promoters, expressed as fold relative to actual ratio of Jk2/Jk5 peaks, which was 1.2. “inf”=0 Jk5 peaks

<sup>b</sup> number of motifs <61 bp to RBP-Jk Class 2 peak/Rta peaks (“Jk2+Rta”) divided by number of motifs <61 bp to RBP-Jk Class 2 peaks (“Jk2”) in early promoters, expressed as fold relative to actual ratio of Jk2+Rta/Jk2 peaks, which was 0.28.

<sup>c</sup> number of promoters with co-localized Class 2 or Class 5 RBP-Jk peak

<sup>d</sup> Rta-c motifs coincident with the indicated POU Motifs (consensus from Homo Sapiens Comprehensive Model Collection (HOCOMOCO) (68,69)).
